# Supplementary material for: Mixture screening strategy of efficient transition metal heteronuclear dual-atom electrocatalysts toward nitrogen fixation
Source: Royal Society of Chemistry journal article supplement (doi:10.1039/d2cp04302e), 2022-01-01
Supplement: d2cp04302e1.pdf [file d2cp04302e1.pdf]

## Electronic supporting information

### Mixture screening strategy of efficient transition metal

### heteronuclear dual-atom electrocatalysts toward nitrogen fixation

Zhouhao Zhu <sup>a,b,†</sup>, Mengshan Chen <sup>c,†</sup>, Mingyuzhi Sun <sup>c</sup>, Jinhu Wang <sup>c</sup>, Yingtang Zhou <sup>c,\*</sup>, Xibao Li <sup>d,\*</sup>, Hengcong Tao <sup>b,\*</sup>

<sup>a</sup> *School of Port and Transportation Engineering, Zhejiang Ocean University, Zhoushan 316022, China.*

<sup>b</sup> *School of Petrochemical Engineering & Environment, Zhejiang Ocean University, Zhoushan 316022, China.*

<sup>c</sup> *National Engineering Research Center for Marine Aquaculture, Marine Science and Technology College, Zhejiang Ocean University, Zhoushan 316004, China.*

<sup>d</sup> *School of Materials Science and Engineering, Nanchang Hangkong University, Nanchang 330063, China.*

\*Corresponding author.

†Show that the authors contributed equally.

*E-mail:* zhouyingtang@zjou.edu.cn (Y. Zhou), lixibao@nchu.edu.cn (X. Li)  
hengcongtao@zjou.edu.cn (H. Tao).

**Table S1**Partial bond lengths of  $M_1M_2$ -NC.

| Catalysts | bond length (Å) |           |           |           |           |           |           |
|-----------|-----------------|-----------|-----------|-----------|-----------|-----------|-----------|
|           | M-M             | $M_1-N_1$ | $M_1-N_2$ | $M_1-N_3$ | $M_2-N_4$ | $M_2-N_5$ | $M_2-N_6$ |
| AuAu-NC   | 2.445           | 1.964     | 2.009     | 1.983     | 1.968     | 2.011     | 1.985     |
| AuCo-NC   | 2.386           | 1.933     | 2.118     | 1.989     | 1.898     | 1.857     | 1.878     |
| AuFe-NC   | 2.397           | 1.942     | 2.111     | 1.995     | 1.934     | 1.885     | 1.898     |
| AuMo-NC   | 2.539           | 1.974     | 2.116     | 1.997     | 2.095     | 2.032     | 2.073     |
| CoCo-NC   | 2.265           | 1.894     | 1.992     | 1.865     | 1.892     | 1.994     | 1.864     |
| FeCo-NC   | 2.190           | 1.886     | 2.067     | 1.914     | 1.878     | 2.002     | 1.883     |
| FeFe-NC   | 2.213           | 1.891     | 2.032     | 1.910     | 1.893     | 2.032     | 1.910     |
| FeMo-NC   | 2.139           | 1.936     | 2.014     | 1.885     | 2.033     | 2.205     | 2.027     |
| MoCo-NC   | 2.174           | 2.045     | 2.188     | 1.992     | 1.949     | 1.964     | 1.843     |
| MoMo-NC   | 2.021           | 1.997     | 2.128     | 2.108     | 1.998     | 2.136     | 2.110     |
| RuAu-NC   | 2.494           | 2.036     | 1.964     | 1.981     | 1.964     | 2.118     | 1.996     |
| RuCo-NC   | 2.249           | 1.990     | 2.059     | 1.944     | 1.917     | 1.999     | 1.889     |
| RuFe-NC   | 2.193           | 2.018     | 2.096     | 1.923     | 1.984     | 1.975     | 1.850     |
| RuMo-NC   | 2.163           | 1.990     | 2.113     | 1.970     | 2.055     | 2.155     | 2.032     |
| RuRu-NC   | 2.231           | 2.063     | 2.034     | 1.913     | 2.067     | 2.034     | 1.912     |
| TiAu-NC   | 2.552           | 1.994     | 1.962     | 2.140     | 1.950     | 2.141     | 2.012     |
| TiCo-NC   | 2.060           | 2.000     | 2.272     | 2.043     | 1.890     | 2.034     | 1.888     |
| TiFe-NC   | 2.211           | 2.051     | 2.235     | 2.024     | 1.931     | 2.039     | 1.894     |
| TiMo-NC   | 2.012           | 1.994     | 2.163     | 2.151     | 1.987     | 2.127     | 2.113     |
| TiRu-NC   | 2.216           | 2.088     | 2.233     | 2.021     | 2.042     | 2.072     | 1.922     |
| TiTi-NC   | 2.531           | 2.095     | 1.991     | 2.073     | 2.065     | 2.072     | 2.001     |
| TiV-NC    | 2.565           | 2.106     | 1.966     | 2.056     | 2.015     | 2.033     | 1.928     |
| VAu-NC    | 2.484           | 2.051     | 1.965     | 2.009     | 1.959     | 2.141     | 2.003     |
| VCo-NC    | 2.117           | 1.986     | 2.158     | 1.954     | 1.913     | 2.015     | 1.871     |
| VFe-NC    | 2.303           | 2.054     | 2.102     | 1.917     | 1.917     | 1.938     | 1.826     |
| VMo-NC    | 2.412           | 2.116     | 1.999     | 1.953     | 2.116     | 2.085     | 1.996     |
| VRu-NC    | 2.224           | 2.052     | 2.077     | 1.937     | 2.041     | 2.051     | 1.912     |
| VV-NC     | 2.448           | 2.084     | 1.986     | 1.919     | 2.100     | 1.983     | 1.925     |

**Table S2**

Formation energy ( $E_f$ ) and adsorption energy ( $E_{ads}$ ) of  $M_1M_2$ -NC and  $N_2$  adsorbed  $M_1M_2$ -NC with side-on and end-on configurations.

| Catalysts | Energy (eV) | $N_2$ adsorption (eV) |         | $E_f$ (eV) | $E_{ads}$ (eV) |        |
|-----------|-------------|-----------------------|---------|------------|----------------|--------|
|           |             | side-on               | end-on  |            | side-on        | end-on |
| AuAu-NC   | -511.41     | -528.08               | -528.10 | 0.70       | -0.04          | -0.06  |
| AuCo-NC   | -516.81     | -533.86               | -533.87 | -0.86      | -0.42          | -0.43  |
| AuFe-NC   | -517.75     | -534.89               | -534.88 | -0.60      | -0.51          | -0.50  |
| AuMo-NC   | -518.50     | -536.26               | -536.25 | 1.35       | -1.13          | -1.13  |
| CoCo-NC   | -521.56     | -538.34               | -538.60 | -1.77      | -0.16          | -0.41  |
| FeCo-NC   | -522.89     | -539.52               | -539.82 | -1.90      | 0.00           | -0.30  |
| FeFe-NC   | -523.75     | -540.96               | -540.96 | -1.57      | -0.58          | -0.57  |
| FeMo-NC   | -525.18     | -542.57               | -542.15 | -0.30      | -0.76          | -0.34  |
| MoCo-NC   | -524.11     | -541.14               | -541.24 | -0.42      | -0.40          | -0.50  |
| MoMo-NC   | -526.44     | -544.72               | -543.94 | 1.14       | -1.65          | -0.86  |
| RuAu-NC   | -517.00     | -533.89               | -534.82 | 1.16       | -0.26          | -1.20  |
| RuCo-NC   | -522.29     | -539.17               | -539.90 | -0.30      | -0.25          | -0.98  |
| RuFe-NC   | -523.60     | -540.38               | -541.03 | -0.41      | -0.15          | -0.80  |
| RuMo-NC   | -525.27     | -542.12               | -542.06 | 0.62       | -0.22          | -0.16  |
| RuRu-NC   | -523.48     | -540.04               | -540.50 | 0.71       | 0.07           | -0.39  |
| TiAu-NC   | -518.31     | -535.82               | -535.92 | -1.56      | -0.88          | -0.99  |
| TiCo-NC   | -523.69     | -541.21               | -540.92 | -3.10      | -0.89          | -0.59  |
| TiFe-NC   | -524.41     | -541.94               | -541.83 | -2.62      | -0.90          | -0.79  |
| TiMo-NC   | -525.34     | -544.34               | -543.33 | -0.86      | -2.36          | -1.36  |
| TiRu-NC   | -524.57     | -541.55               | -542.00 | -1.78      | -0.35          | -0.80  |
| TiTi-NC   | -524.27     | -543.47               | -543.49 | -2.88      | -2.57          | -2.59  |
| TiV-NC    | -524.90     | -543.79               | -542.59 | -2.36      | -2.26          | -1.06  |
| VAu-NC    | -518.74     | -535.83               | -536.35 | -0.83      | -0.46          | -0.99  |
| VCo-NC    | -523.94     | -541.20               | -541.33 | -2.20      | -0.63          | -0.76  |
| VFe-NC    | -524.39     | -542.39               | -542.35 | -1.45      | -1.37          | -1.33  |
| VMo-NC    | -525.15     | -544.51               | -544.58 | 0.49       | -2.73          | -2.80  |
| VRu-NC    | -524.78     | -542.23               | -542.23 | -0.83      | -0.82          | -0.82  |
| VV-NC     | -525.40     | -544.12               | -542.95 | -1.71      | -2.09          | -0.92  |

**Table S3.**

Total energy ( $E_{\text{bulk}}$ ) and average energy ( $E_{\text{M}}$ ) of metal atoms in their bulk phase and structural parameters (lattice length a and b and angle  $\gamma$ )

| Metal | $E_{\text{bulk}}$ (eV) | a ( $\text{\AA}$ ) | b ( $\text{\AA}$ ) | $\gamma$ (degree) | $E_{\text{M}}$ (eV) |
|-------|------------------------|--------------------|--------------------|-------------------|---------------------|
| Au    | -12.77                 | 4.08               | 4.078              | 90                | -3.19               |
| Co    | -14.07                 | 2.51               | 2.171              | 90                | -7.03               |
| Fe    | -16.46                 | 2.87               | 2.866              | 90                | -8.23               |
| Mo    | -21.86                 | 3.15               | 3.147              | 90                | -10.93              |
| Ru    | -18.47                 | 2.71               | 2.706              | 120               | -9.23               |
| Ti    | -15.66                 | 2.95               | 2.951              | 120               | -7.83               |
| V     | -17.97                 | 3.03               | 3.028              | 90                | -8.99               |

**Table S4.**Comparison of calculated limiting potential ( $U_L$ ) of NRR on different catalysts.

| Catalysts                                                     | $U_L$ vs. CHE | References |
|---------------------------------------------------------------|---------------|------------|
| VRu-NC                                                        | -0.21         | This work  |
| TiCo-NC                                                       | -0.23         |            |
| Ru (0001)                                                     | -0.98         | 1          |
| Ti@N <sub>4</sub>                                             | -0.69         | 2          |
| V@N <sub>4</sub>                                              | -0.87         |            |
| Mo <sub>2</sub> @V <sub>3</sub> C <sub>2</sub> O <sub>2</sub> | -0.31         | 3          |
| Mo <sub>3</sub> @V <sub>3</sub> C <sub>2</sub> O <sub>2</sub> | -0.33         |            |
| W <sub>2</sub> @V <sub>3</sub> C <sub>2</sub> O <sub>2</sub>  | -0.34         |            |
| W <sub>3</sub> @V <sub>3</sub> C <sub>2</sub> O <sub>2</sub>  | -0.31         |            |
| Ti <sub>2</sub> -Pc                                           | -0.75         | 4          |
| V <sub>2</sub> -Pc                                            | -0.39         |            |
| TiV-Pc                                                        | -0.74         |            |
| VCr-Pc                                                        | -0.85         |            |
| VTa-Pc                                                        | -0.47         |            |
| VFe-N-C                                                       | -0.36         | 5          |
| Ru <sub>2</sub> @GY                                           | -0.43         | 6          |
| Mo <sub>3</sub> @GDY                                          | -0.32         | 7          |
| FeCo@GDY                                                      | -0.44         | 8          |
| NiCo@GDY                                                      | -0.36         |            |

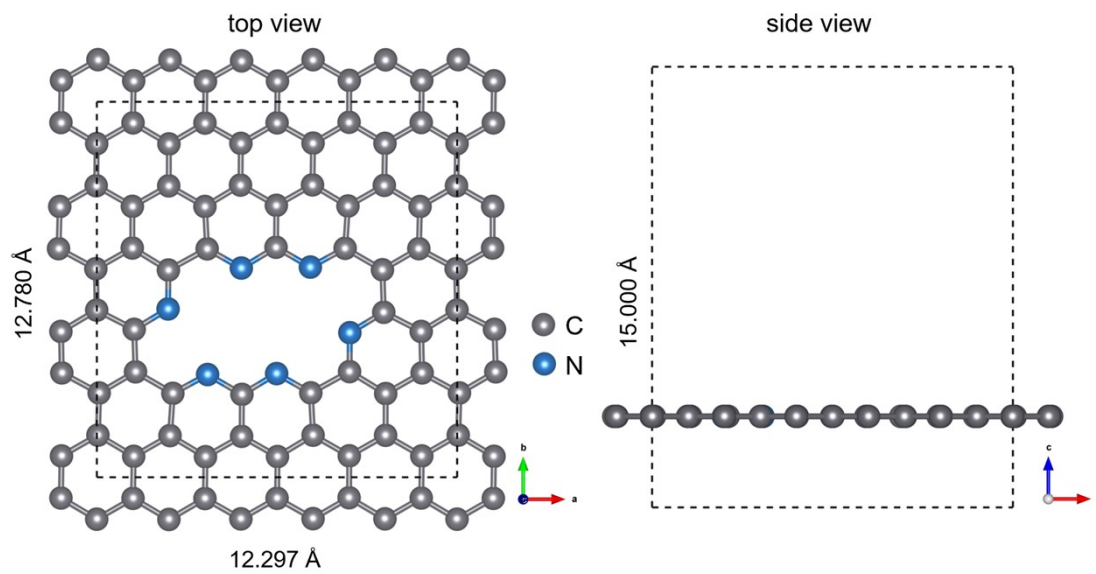

**Fig. S1.** Optimized structure of substrate nitrogen-doped graphene.

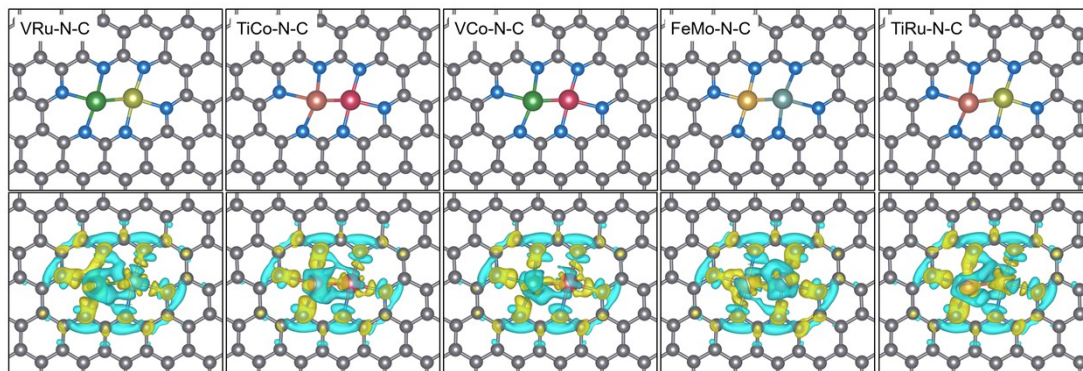

**Fig. S2.** Charge density differences of VRu-NC, TiCo-NC, FeMo-NC, VCo-NC and TiRu-NC. the yellow and cyan areas denote as the charge accumulation and loss, respectively. The isosurface value is set as  $0.003 \text{ e}/\text{\AA}^3$

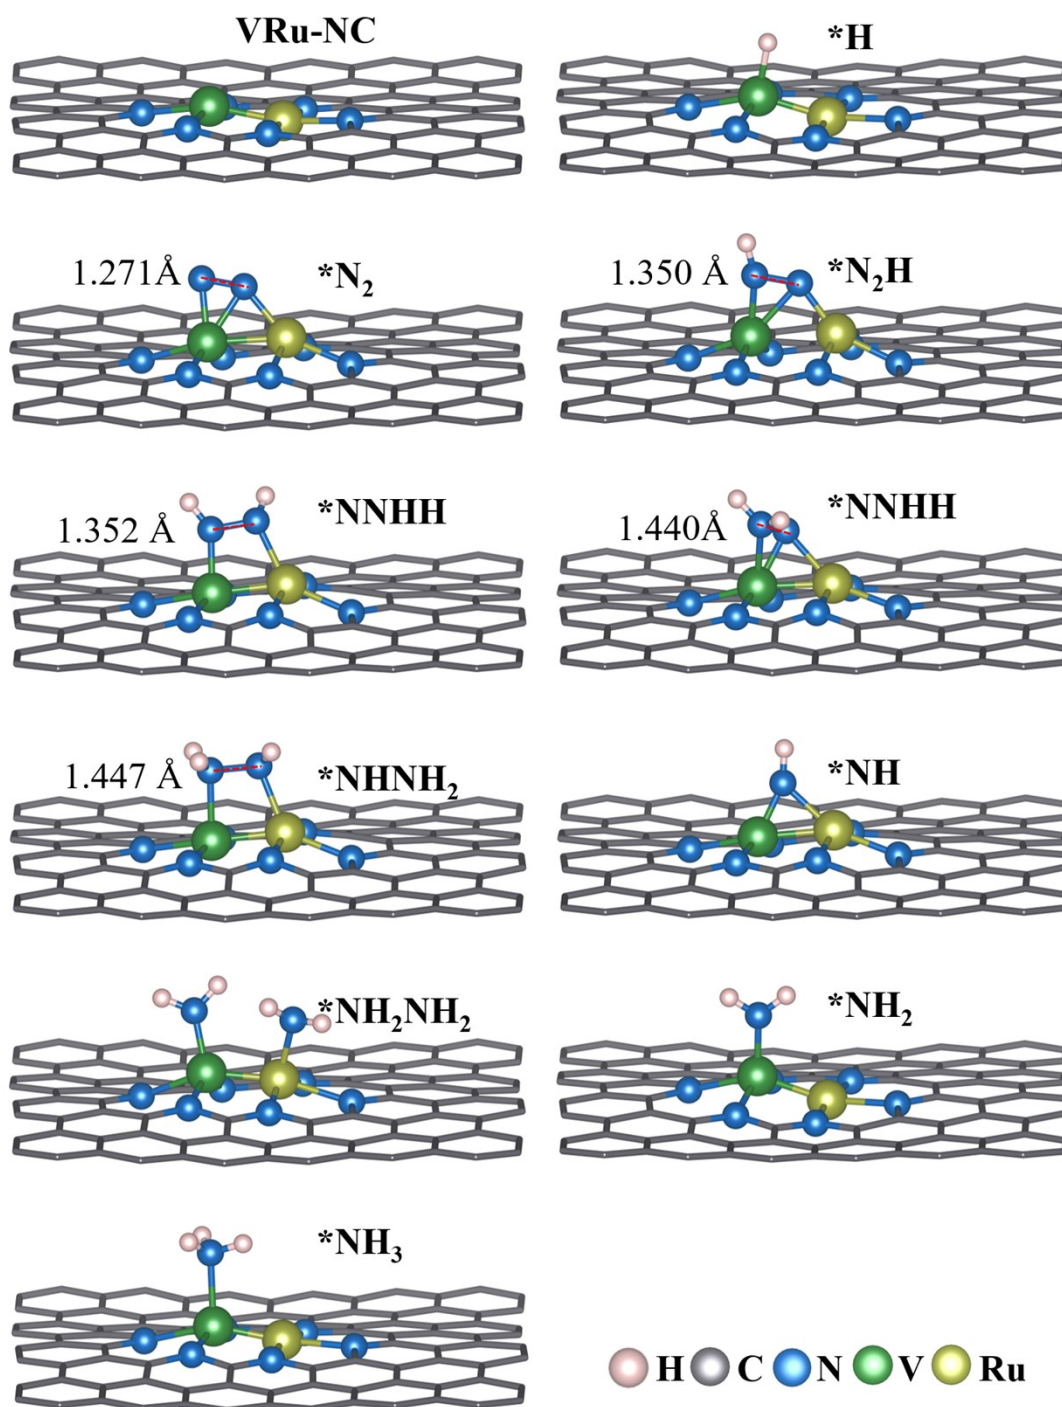

**Fig. S3.** Optimized structures and bond lengths of reaction intermediates on VRu-NC surface.



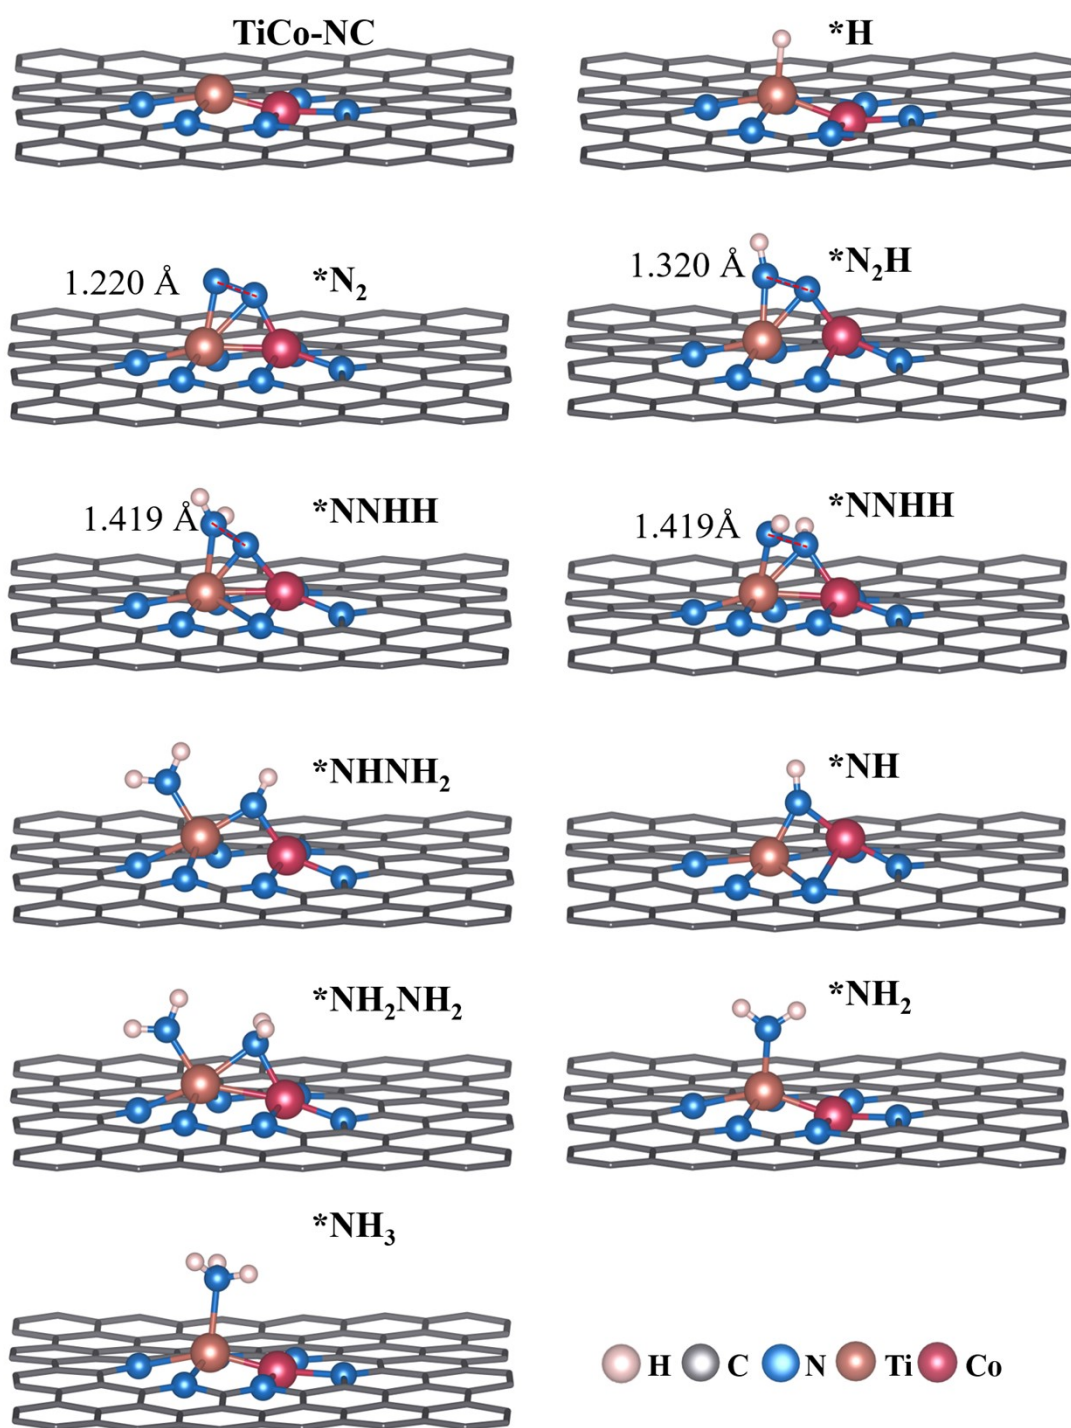

**Fig. S4.** Optimized structures and bond lengths of reaction intermediates on TiCo-NC surface.

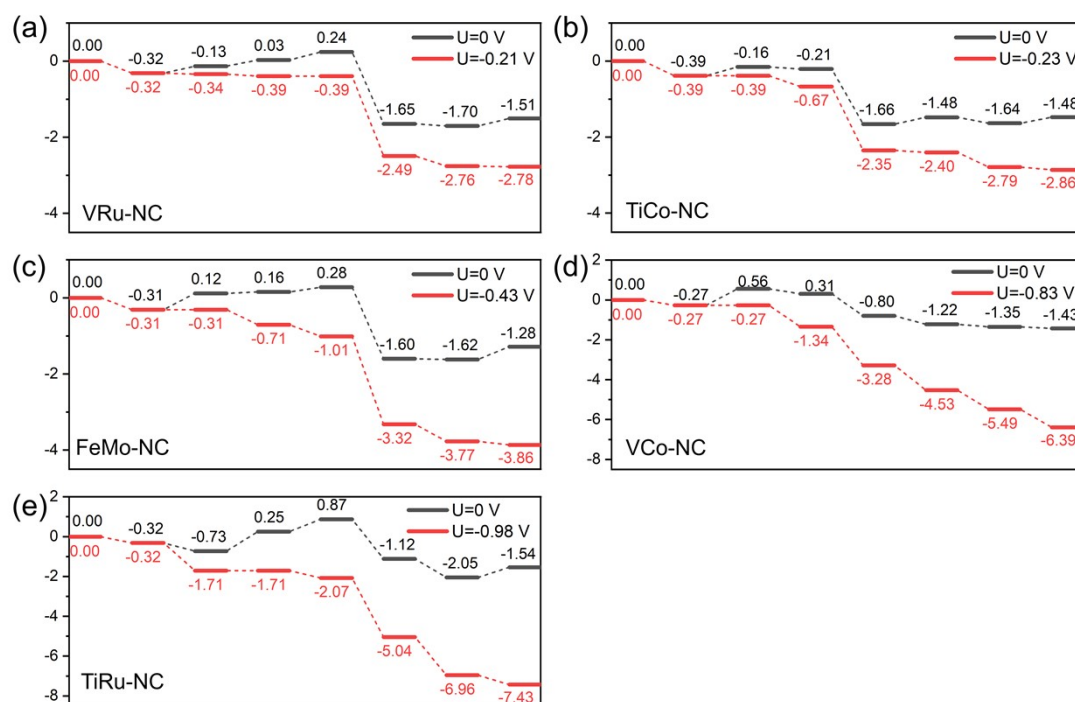

**Fig. S5.** The free energy diagrams for the NRR towards  $\text{NH}_3$  and the corresponding free energy changes with the introduction of electrode potential of a) VRu-NC, b) TiCo-NC, c) FeMo-NC, d) VCo-NC and e) TiRu-NC.

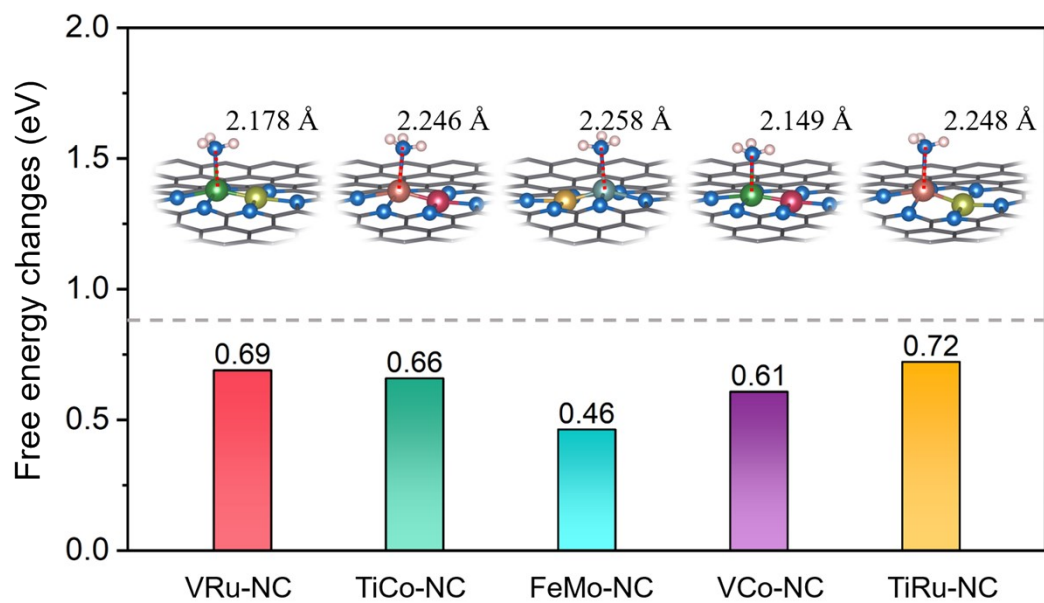

**Fig. S6.** Optimized structures and bond lengths of NH<sub>3</sub> adsorbed on surface VRu-NC, TiCo-NC, FeMo-NC, VCo-NC and TiRu-NC.

# S1. The crystallographic information file of substrate nitrogen-doped graphene.

#####

# CRYSTAL DATA

#-----

data\_VESTA\_phase\_1

\_chemical\_name\_common 'Graphene'  
\_cell\_length\_a 12.297500  
\_cell\_length\_b 12.780000  
\_cell\_length\_c 15.000000  
\_cell\_angle\_alpha 90.000000  
\_cell\_angle\_beta 90.000000  
\_cell\_angle\_gamma 90.000000  
\_cell\_volume 2357.430635  
\_space\_group\_name\_H-M\_alt 'P 1'  
\_space\_group\_IT\_number 1

loop\_

\_space\_group\_symop\_operation\_xyz  
'x, y, z'

loop\_

\_atom\_site\_label  
\_atom\_site\_occupancy  
\_atom\_site\_fract\_x  
\_atom\_site\_fract\_y  
\_atom\_site\_fract\_z  
\_atom\_site\_adp\_type  
\_atom\_site\_B\_iso\_or\_equiv  
\_atom\_site\_type\_symbol  
C1 1.0 0.003015 0.112312 0.206550 Biso 1.000000 C  
C2 1.0 0.107307 0.280879 0.206550 Biso 1.000000 C  
C3 1.0 0.006376 0.224476 0.206550 Biso 1.000000 C  
C4 1.0 0.102233 0.055782 0.206550 Biso 1.000000 C  
C5 1.0 0.203029 0.110999 0.206550 Biso 1.000000 C  
C6 1.0 0.210920 0.223531 0.206550 Biso 1.000000 C  
C7 1.0 0.301481 0.054598 0.206550 Biso 1.000000 C  
C8 1.0 0.401788 0.109127 0.206550 Biso 1.000000 C  
C9 1.0 0.402673 0.220717 0.206550 Biso 1.000000 C  
C10 1.0 0.501327 0.055074 0.206550 Biso 1.000000 C  
C11 1.0 0.600112 0.112139 0.206550 Biso 1.000000 C  
C12 1.0 0.701376 0.281491 0.206550 Biso 1.000000 C  
C13 1.0 0.593843 0.224821 0.206550 Biso 1.000000 C  
C14 1.0 0.700591 0.057075 0.206550 Biso 1.000000 C

|     |     |           |          |          |      |          |   |
|-----|-----|-----------|----------|----------|------|----------|---|
| C15 | 1.0 | 0.801457  | 0.111865 | 0.206550 | Biso | 1.000000 | C |
| C16 | 1.0 | 0.902786  | 0.277976 | 0.206550 | Biso | 1.000000 | C |
| C17 | 1.0 | 0.801721  | 0.222830 | 0.206550 | Biso | 1.000000 | C |
| C18 | 1.0 | 0.901871  | 0.056775 | 0.206550 | Biso | 1.000000 | C |
| C19 | 1.0 | -0.000354 | 0.445101 | 0.206550 | Biso | 1.000000 | C |
| C20 | 1.0 | 0.098306  | 0.610525 | 0.206550 | Biso | 1.000000 | C |
| C21 | 1.0 | -0.002795 | 0.555385 | 0.206550 | Biso | 1.000000 | C |
| C22 | 1.0 | 0.103598  | 0.393950 | 0.206550 | Biso | 1.000000 | C |
| C23 | 1.0 | 0.306139  | 0.608490 | 0.206550 | Biso | 1.000000 | C |
| C24 | 1.0 | 0.198602  | 0.551840 | 0.206550 | Biso | 1.000000 | C |
| C25 | 1.0 | 0.497308  | 0.612630 | 0.206550 | Biso | 1.000000 | C |
| C26 | 1.0 | 0.689067  | 0.609875 | 0.206550 | Biso | 1.000000 | C |
| C27 | 1.0 | 0.796294  | 0.439436 | 0.206550 | Biso | 1.000000 | C |
| C28 | 1.0 | 0.893639  | 0.608894 | 0.206550 | Biso | 1.000000 | C |
| C29 | 1.0 | 0.792655  | 0.552530 | 0.206550 | Biso | 1.000000 | C |
| C30 | 1.0 | 0.900257  | 0.388272 | 0.206550 | Biso | 1.000000 | C |
| C31 | 1.0 | -0.001826 | 0.776525 | 0.206550 | Biso | 1.000000 | C |
| C32 | 1.0 | 0.100388  | 0.943955 | 0.206550 | Biso | 1.000000 | C |
| C33 | 1.0 | -0.000308 | 0.888470 | 0.206550 | Biso | 1.000000 | C |
| C34 | 1.0 | 0.098588  | 0.721456 | 0.206550 | Biso | 1.000000 | C |
| C35 | 1.0 | 0.199436  | 0.776200 | 0.206550 | Biso | 1.000000 | C |
| C36 | 1.0 | 0.300016  | 0.943423 | 0.206550 | Biso | 1.000000 | C |
| C37 | 1.0 | 0.199984  | 0.887695 | 0.206550 | Biso | 1.000000 | C |
| C38 | 1.0 | 0.299920  | 0.721148 | 0.206550 | Biso | 1.000000 | C |
| C39 | 1.0 | 0.398680  | 0.778242 | 0.206550 | Biso | 1.000000 | C |
| C40 | 1.0 | 0.500242  | 0.944087 | 0.206550 | Biso | 1.000000 | C |
| C41 | 1.0 | 0.399758  | 0.889211 | 0.206550 | Biso | 1.000000 | C |
| C42 | 1.0 | 0.498207  | 0.724235 | 0.206550 | Biso | 1.000000 | C |
| C43 | 1.0 | 0.598530  | 0.778742 | 0.206550 | Biso | 1.000000 | C |
| C44 | 1.0 | 0.700056  | 0.945577 | 0.206550 | Biso | 1.000000 | C |
| C45 | 1.0 | 0.600000  | 0.889890 | 0.206550 | Biso | 1.000000 | C |
| C46 | 1.0 | 0.696963  | 0.722377 | 0.206550 | Biso | 1.000000 | C |
| C47 | 1.0 | 0.797807  | 0.777531 | 0.206550 | Biso | 1.000000 | C |
| C48 | 1.0 | 0.900353  | 0.944819 | 0.206550 | Biso | 1.000000 | C |
| C49 | 1.0 | 0.799647  | 0.889334 | 0.206550 | Biso | 1.000000 | C |
| C50 | 1.0 | 0.897037  | 0.721023 | 0.206550 | Biso | 1.000000 | C |
| N1  | 1.0 | 0.307368  | 0.273597 | 0.206550 | Biso | 1.000000 | N |
| N2  | 1.0 | 0.499015  | 0.276122 | 0.206550 | Biso | 1.000000 | N |
| N3  | 1.0 | 0.197650  | 0.448327 | 0.206550 | Biso | 1.000000 | N |
| N4  | 1.0 | 0.400986  | 0.557193 | 0.206550 | Biso | 1.000000 | N |
| N5  | 1.0 | 0.592614  | 0.559775 | 0.206550 | Biso | 1.000000 | N |
| N6  | 1.0 | 0.702261  | 0.384988 | 0.206550 | Biso | 1.000000 | N |

## References

1. E. Skulason, T. Bligaard, S. Gudmundsdottir, F. Studt, J. Rossmeisl, F. Abild-Pedersen, T. Vegge, H. Jonsson and J. K. Nørskov, *Phys Chem Chem Phys*, 2012, **14**, 1235-1245.
2. C. Choi, S. Back, N. Kim, J. Lim, Y. Kim and Y. Jung, *ACS Catal.*, 2018, **8**, 7517-7525.
3. J. Wan, Y. Wang, W. Tian, H. Zhang and Y. Wang, *Appl. Surf. Sci.*, 2021, **569**, 151020.
4. X. Guo, J. Gu, S. Lin, S. Zhang, Z. Chen and S. Huang, *J. Am. Chem. Soc.*, 2020, **142**, 5709-5721.
5. C. N. Sun, Z. L. Wang, X. Y. Lang, Z. Wen and Q. Jiang, *ChemSusChem*, 2021, **14**, 4593-4600.
6. L. Jasin Arachchige, Y. Xu, Z. Dai, X. Zhang, F. Wang and C. Sun, *J. Phys. Chem. C*, 2020, **124**, 15295-15301.
7. M. Li, Y. Cui, X. Zhang, Y. Luo, Y. Dai and Y. Huang, *J. Phys. Chem. Lett.*, 2020, **11**, 8128-8137.
8. D. Ma, Z. Zeng, L. Liu and Y. Jia, *J. Energy Chem.*, 2021, **54**, 501-509.
